# Supplementary material
Source: publisher site journal article supplement (https://www.dovepress.com/article/244011)
Supplement: Supplementary file 1 [file get_supplementary_file.php]

**Supplementary Table 1.** Longitudinal studies reporting absenteism in relation to treatment with TNF inhibitors in patients with Crohn’s disease

| **Author**  **Year**  **Study** | **Study, population** | **Exposure** | **Time point of assessment** | **Assessment of outcome** | **Results** |
| --- | --- | --- | --- | --- | --- |
| Lichtenstein 2004  ACCENT I | N=573 | Long-term dosing or single dose IFX | 0-54 weeks | Questionnaire | Unemployment rate at baseline 38%. In patients who were unemployed at baseline, 31% were employed at 54 weeks if remission was achieved (35-40%), compared to 16% of those not in remission. |
| Lichtiger 2010,  CHOICE | N=673 patients who failed IFX treatment  17% IFX primary non-responders  83% IFX primary responders | Adalilumab every 2 weeks | 4, 8, 12, 24 weeks | WPAI:CD | Mean change from baseline in absenteeism was -8.3, -6.5, -7.5, -7.2 |
| Feagan, 2010  PRECISE | Responders at week 4 n=425 (64%)  Active treatment n=215  Placebo n=210 | Certolizumab every 4 weeks | 06, 16, 26 weeks | Work Productivity and Activity  Impairment for CD questionnaire  Work Productivity and Activity  Impairment for CD questionnaire  WPAI:CD | Score of absenteism was 10% lower from induction to 26 weeks in treated patients compared to placebo |
| Feagan,  2011  WELCOME | N=334 (62%)  responders at week 6 | Certolixumab every 2 or 4 weeks | 0-26 weeks | WPAI:CD | Absenteism dropped from 25% to 6% and from 23% to 11% |
| Panaccione  2011  ACCESS | N=304  IFX experienced n=160  Anti-TNF naive n=144 | Adalilumab every 2 weeks | 0-6 months | WPAI:CD | Mean change in absenteeism:  12 weeks: −8.8 points for the anti-TNF-naive group  4 weeks −7.2 points, 8 weeks −9.2 points, 24 weeks −7.6 points for the infliximab-experienced group.  At the final visit, 69% of patients were employed compared with 64% at baseline |
| Binion,  2011  ACCESS, CARE, CHOICE, EXTEND | Meta-analysis N=1,202 | Adalilumab every 2 weeks | 0-20 weeks (CARE), 0-24 weeks (ACCESS and CHOICE) 0- 52 weeks (EXTEND) | WPAI:CD | Pooled estimates (95% CIs) for absenteeism: -9% (-10% to -7%) |
| Steenholdt,  2015 | N=69 with IFX treatment failure | Intensified IFX regimen (n = 36)  Personalized treatment defined by IFX and anti-IFX antibodies (n = 33) | 0-6 months | WPAI:CD | Absenteeism in employed individuals (n=38) was negligible during the entire study period. |
| Louis  2013  CARE | N=945  N=785 (83%) completed 20 weeks | Adalimumab every 2 weeks | 0, 2, 4, 8, 12, 20 weeks | WPAI:CD | Mean change from baseline in absenteeism was -9.6 at 4 weeks (N=353) and -9.8 at 20 weeks (N=328) |
| Saro 2017  EFICA- DEC | N=126 bio-naïve patients | Adalimumab according to clinical practice | 1, 3, 6, 9, and 12 months | WPAI:CD | CD-caused absenteeism > 50% decreased from 1/3 to 1/10 from baseline to 12 months |
| Current study  2019 | N=853 bio-naïve patients and N=326 patients starting 2nd line treatment | Any TNF inhibitor | -6 months to 18 months | Lost workdays according to the Social Insurance Agency | 7%-8% reduction in absenteeism from start of treatment to week 24 in bio-naïve patients and 1%-6% reduction in absenteeism for second line treatment |

**Supplementary Table 2.** ICD-codes that, if occurring before Jan 1st 2007, excluded the patient from participation in the study

|  | **ICD-7** | **ICD-8** | **ICD-9** | **ICD-10** |
| --- | --- | --- | --- | --- |
|  | **1964-1968** | **1969-1986** | **1987-1996** | **1997-** |
| Ulcerative colitis (UC) | 572,20 ; 572,21; 578,03 | 563,10 ; 563,99 ; 569,02 | 556 | K51 |
| Crohn’s disease (CD) | 572,00 ; 572,09 | 563,00 | 555 | K50 |
| IBD unclassified (IBD-U) | UC+CD | UC+CD | UC+CD | UC + CD,  or K52.3 |

**Supplementary Table 3**. ICD codes for medication used in patients with Crohn’s disease

| **Drug group** | **Substance** | **ATC-code** | **Conversion factor to Prednisolon equivalents*** |
| --- | --- | --- | --- |
| Immunomodulators | Azathioprine | L04AX01 |  |
|  | Mercaptopurine | L01BB02 |  |
|  | Methotrexate | L04AX03/L01BA01 |  |
| Biologics | Infliximab | L04AB02 (L04AA12 before 2008) |  |
|  | Adalimumab | L04AB04 (L04AA17 before 2008) |  |
|  | Golimumab | L04AB06 |  |
|  | Vedolizumab | L04AA33 |  |
|  | Certolizumab | L04AB05 |  |
|  | Ustekinumab | L04AC05 |  |
| Oral corticosteroids | Betamethasone | H02AB01 | 8.33 |
|  | Dexamethasone | H02AB02 | 6.67 |
|  | Methylprednisolone | H02AB04 | 1.25 |
|  | Prednisolone | H02AB06 | 1 |
|  | Prednisone | H02AB07 | 1 |
| Aminosalicylates (5-ASA) | Sulfasalazine | A07EC01 |  |
|  | Mesalazine | A07EC02 |  |
|  | Olsalazine | A07EC03 |  |
|  | Balsalazide | A07EC04 |  |

* Conversion calculated according to Liu D, Ahmet A, Ward L, et al. A practical guide to the monitoring and management of the complications of systemic corticosteroid therapy. Allergy Asthma Clin Immunol 2013;9:30.

**Supplementary table 4.** Surgical procedure codes

| **Surgical procedure** | **7th rev**  **(KKÅ97)** |
| --- | --- |
| **Intestinal surgery** |  |
| Ileocecal resection | JFB20, JFB21, JFB30, JFB31, JFB33, JFB34 |
| Small bowel resection | JFB00, FFB01 |
| Colectomy | JFH00, JFH01, JFH10, JFH11, JFH20, JFH96, JFH30 |
| Segmental colon resection | JFB40, JFB41, JFB43, JFB44, JFB46, JFB47, JFB50, JFB51, JFB60, JFB61, JFB63, JFB64, JGB00, JGB01, JGB10, JGB11 |
| Proctectomy | JFH20, JGB30, JGB31, JGB40, JGB96, JGB97 |
| Other bowel surgery |  |
| *Strictureplasty* | JFA60, JFA63 |
| Enterorraphy | JFA70, JFA71, JFA80, JFA81 |
| *Closure of fistula* | JFA76, JFA86 |
| *Other intestinal resection* | JFB96, JFB97 |
| *Intestinal anastomosis and by-pass* | JFC00, JFC01, JFC10, JFC11, JFC20, JFC21, JFC30, JFC31, JFC50, JFC51 |
| *Formation of stoma* | JFF10, JFF11, JFF13, JFF16, JFF23, JFF24, JFF26, JFF27, JFF30, JFF31, JFF96, JFF97 |
| *Operations on intestinal stoma or reservoir* | JFG40, JFG50, JFG53, JFG56, JFG60, JFG73, JFG76, JFG80, JFG83, JFG86, JFG96 |
| *Other intestinal surgery* | JFW96, JFW97 |
| *Ileoanal anastomosis* | JGB50, JGB60, JFH30, JFH33, JFH40 |
| *Ileorectal anastomosis* | JFC40, JFC41 |
| **Perianal surgery** |  |
| Perianal incision and drainage | JHA00 |
| Dilatation of the anal sphincter | JHD00 |
| Lay open or excision of perianal fistula | JHD20 |
| Partial lay open or excision of perianal fistula (including seton placement) | JHD30 |
| Completion lay open or excision of perianal fistula | JHD33 |
| Excision of perianal fistula with advancement flap | JHD50 |
| Occlusion of perianal fistula with collagen plug | JHD60 |
| Occlusion of perianal fistula with fibrin glue | JHD63 |
| Other anal or perianal surgery (e.g. examination under anesthesia) | JHW96 |

**Supplementary table 5.** ICD codes for extraintestinal manifestations

|  | **ICD-10** |
| --- | --- |
|  |  |
| Primary Sclerosing Cholangitis | K83.0 |
| ***Cutaneous manifestations*** |  |
| Erythema nodosum | L52 |
| Pyoderma gangraenosum | L88 |
| Sweet syndrome | L98.2 |
| ***Ocular manifestation*** |  |
| Iridocyclitis | H20 |
| ***Joint manifestations*** |  |
| Arthropaty in Crohn’s disease | M07.4 |
| Arthropaty in Ulcerative colitis | M07.5 |
| Other defined arthropathy in gastrointestinal disorders | M07.6 |
| Juvenile arthritis in Crohn’s disease | M09.1 |
| Juvenile arthritis in Ulcerative colitis | M09.2 |
| Bechterew’s disease | M45 |
| Spondylarthritis, inflammatory NOD | M460, M461, M468, M469 |
| Arthritis NOD | M139, M255 |

**Supplementary table 6.** ICD codes for Montreal classification. Patients’ phenotypes were defined by the highest available degree of anatomic distribution of inflammation. Patients who were never diagnosed with a code representing a specific location were classified as LX.

|  | **Montreal classification** | **Diagnostic codes** |
| --- | --- | --- |
|  | **Location** |  |
| L1 | Small bowel disease or terminal ileitis | K50.0 |
| L2 | Colon | K50.1 |
| L3/LX | Ileocecal Crohn’s disease or location not defined | K50.8, K50.9 |
|  | **Behavior** |  |
| B1 | Non-stricturing, non-penetrating | None of the ICD-codes for B2 or B3. |
| B2 | Stricturing | Crohn’s disease AND any of the following codes (K56.5; K56.6; K56.7; K62.4) |
| B3 | Penetrating | Crohn’s disease AND any of the following diagnostic codes (K63.0, K63.2, K31.6, N82.2, N82.3, N82.4) OR any of the following surgical procedure codes (JFA76, JFA86). |
| P | Perianal disease | Crohn’s disease AND any of the following diagnostic codes: (K60.3, K60.4, K60.5, K61.0, K61.1, K61.2, K61.3, K61.4, K62.4) OR any of the following surgical procedure codes: (JHD20, JHD30, JHD33, JHD50, JHD60, JHD63, JHA00, JHD00, JHW96) |

**Supplementary Table 7.** Characteristics of working-age patients with Crohn’s disease diagnosed July 1st 2006- Sep 30th 2013 and matched population comparators subjects

|  | **Patients with Crohn’s disease** | **Population comparator subjects** | **P-value[[1]](#footnote-1)** |
| --- | --- | --- | --- |
| **N** | 3,956 | 19,716 |  |
| **Sex, n (%)** |  |  | 0.97 |
| Men, n (%) | 1,926 (49) | 9,590 (49) |  |
| Women, n (%) | 2,030 (51) | 10,126 (51) |  |
| **Age at diagnosis/match** |  |  |  |
| Median (25th-75th; min-max) years | 34 (25-46;19-59) | 34 (25-46;19-59) | 0.87 |
| ***Categories, n (%)*** |  |  | 1.00 |
| 19-29 years | 1,572 (40) | 7,853 (40) |  |
| 30-39 years | 810 (20) | 4,047 (21) |  |
| 40-49 years | 839 (21) | 4,178 (21) |  |
| 50-59 years | 735 (19) | 3,638 (18) |  |
| **Education, n (%)** |  |  | 0.69 |
| ≤9 years | 596 (15) | 2,974 (15) |  |
| 10-12 years | 2,107 (53) | 10,531 (53) |  |
| ≥12 years | 1,187 (30) | 5,932 (30) |  |
| unknown | 66 (1.7) | 279 (1.4) |  |
| **Follow-up time**  Median (25th-75th; min-max) years | 5.3 (3.6-7.1;0-9.2) | 5.4 (3.6-7.1;0-9.2) | 0.11 |
| Death during follow-up n (%) | 66 (1.7) | 106 (0.54) | <0.0001 |
| **Medication for Crohn’s disease, n(%)** |  |  |  |
| Aminosalicylates | 1547 (39) |  |  |
| Immunomodulators | 2,043 (52) |  |  |
| Systemic corticosteroids | 2,560 (65) |  |  |
| TNF inhibitors | 853 (22) |  |  |
| **Surgery for Crohn’s disease, n (%)** |  |  |  |
| Any intestinal surgery | 719 (18) |  |  |
| *Ileocecal or small bowel resection* | *621 (16)* |  |  |
| *Partial or total colectomy* | *140 (3.5)* |  |  |
| *Other intestinal surgery* | *704 (18)* |  |  |
| Perianal surgery | 276 (7.0) |  |  |

**Supplementary Table 8**. Mean number of lost workdays from 6 months before to 18 months after start of treatment with aminosalicylate, immunomodulator, TNF inhibitor, and intestinal surgery in all patients starting treatment (first column), and in patients not requiring additional or other treatment (second column)

|  | **Aminosalicylate** | | **Immunomodulator** | | **1st line TNF inhibitor** | | **2nd line TNF inhibitor** | | **Intestinal surgery** | |
| --- | --- | --- | --- | --- | --- | --- | --- | --- | --- | --- |
|  | **Starting treatment**  Mean days  (95% CI) | **Continuing treatment**  Mean days  (95% CI) | **Starting treatment**  Mean days  (95% CI) | **Continuing treatment**  Mean days  (95% CI) | **Starting treatment**  Mean days  (95% CI) | **Continuing treatment**  Mean days  (95% CI) | **Starting treatment**  Mean days  (95% CI) | **Continuing treatment**  Mean days  (95% CI) | **Starting treatment**  Mean days  (95% CI) | **Continuing treatment**  Mean days  (95% CI) |
| **-6** | 3.66 (3.15-4.17) | 3.66 (3.19-4.12) | 3.83 (3.45-4.22) | 3.83 (3.42-4.25) | 4.42 (3.82-5.03) | 4.42 (3.72-5.11) | 5.56 (4.49-6.63) | 5.56 (4.51-6.61) | 5.54 (4.83-6.25) | 5.54 (4.75-6.33) |
| **-3** | 4.36 (3.87-4.86) | 4.36 (3.93-4.80) | 4.63 (4.19-5.07) | 4.63 (4.20-5.07) | 5.63 (4.95-6.32) | 5.63 (4.90-6.37) | 6.06 (4.92-7.20) | 6.06 (4.93-7.19) | 6.78 (6.02-7.55) | 6.78 (6.02-7.55) |
| **0** | 6.21 (7.72-6.70) | 6.21 (5.67-6.75) | 6.46 (5.93-6.99) | 6.18 (5.66-6.71) | 7.24 (6.51-7.97) | 7.20 (6.34-8.07) | 6.15 (4.99-7.30) | 5.85 (4.68-7.01) | 16.9 (16.1-17.7) | 16.5 (15.6-17.3) |
| **3** | 4.60 (4.12-5.08) | 4.11 (3.62-4.60) | 4.89 (4.41-5.37) | 4.45 (3.99-4.90) | 5.48 (4.70-6.26) | 5.06 (4.37-5.75) | 5.76 (4.55-6.98) | 4.57 (3.27-5.87) | 7.19 (6.28-8.09) | 6.84 (5.83-7.86) |
| **6** | 4.44 (3.95-4.93) | 4.00 (3.44-4.56) | 4.37 (3.93-4.80) | 4.00 (3.53-4.47) | 5.17 (4.47-5.87) | 4.83 (4.07-5.59) | 5.69 (4.32-7.06) | 3.98 (2.38-5.59) | 6.36 (5.51-7.21) | 5.92 (4.99-6.85) |
| **9** | 4.27 (3.72-4.81) | 3.79 (3.23-4.35) | 4.16 (3.72-4.61) | 3.83 (3.42-4.23) | 4.93 (4.13-5.73) | 4.26 (3.54-4.99) | 5.65 (4.32-6.98) | 3.24 (1.85-4.64) | 6.21 (5.36-7.05) | 5.63 (4.73-6.52) |
| **12** | 4.25 (3.78-4.72) | 3.80 (3.23-4.37) | 4.12 (3.67-4.56) | 3.53 (3.05-4.02) | 4.87 (4.05-5.69) | 4.19 (3.51-4.88) | 6.14 (4.56-7.72) | 3.50 (1.84-5.16) | 5.81 (4.87-6.75) | 5.23 (4.18-6.28) |
| **15** | 4.04 (3.51-4.58) | 3.63 (3.04-4.23) | 3.97 (3.55-4.40) | 3.46 (3.00-3.92) | 4.48 (3.85-5.11) | 3.74 (2.97-4.51) | 5.46 (3.92-7.01) | 3.52 (1.82-5.23) | 5.28 (4.41-6.16) | 4.75 (3.88-5.62) |
| **18** | 3.94 (3.43-4.44) | 3.67 (3.09-4.24) | 3.84 (3.42-4.25) | 3.36 (2.89-3.84) | 4.52 (3.84-5.19) | 3.80 (3.04-4.56) | 5.31 (4.09-6.53) | 3.02 (1.60-4.44) | 4.71 (3.86-5.56) | 4.28 (3.44-5.12) |

**Supplementary Figure 1**. Flow-chart of participants and registers used

**Supplementary Figure 2.** Mean number of lost workdays per month from 6 months before to 18 months after start of ***TNF inhibitor*** in patients and matched population comparators in subgroups stratified for sex (men/women), age (19-39, 40-49, 50-59 years), and education (≤9, 10-12, >12 years)

**Supplementary Figure 3.** Mean number of lost workdays per month from 6 months before to 18 months after start of ***aminosalicylate*** in patients and matched population comparators in subgroups stratified for sex (men/women), age (19-39, 40-49, 50-59 years), and education (≤9, 10-12, >12 years)

**Supplementary Figure 4.** Mean number of lost workdays per month from 6 months before to 18 months after start of ***immunomodulator*** in patients and matched population comparators in subgroups stratified for sex (men/women), age (19-39, 40-49, 50-59 years), and education (≤9, 10-12, >12 years)

**Supplementary Figure 5.** Mean number of lost workdays per month from 6 months before to 18 months after ***intestinal surgery*** in patients and matched population comparators in subgroups stratified for sex (men/women), age (19-39, 40-49, 50-59 years), and education (≤9, 10-12, >12 years)

1. Wilcoxon signed rank test or Chi square test [↑](#footnote-ref-1)
